# Supplementary material for: α-Mangostin remodels visceral adipose tissue inflammation to ameliorate age-related metabolic disorders in mice
Source: PubMed Central journal article supplement (PMC6932911; doi:10.18632/aging.102512), 2019-12-06
Supplement: aging-11-102512-s001..pdf [file aging-11-102512-s001..pdf]

## SUPPLEMENTARY TABLES

**Supplementary Table 1. Effect of  $\alpha$ -Man on body weight of old mice.**

| Week | Body weight (g) |                          |            |                          |
|------|-----------------|--------------------------|------------|--------------------------|
|      | Y               | O                        | L          | H                        |
| 0    | 24.32±2.31      | 40.34±5.37 <sup>##</sup> | 37.92±5.32 | 38.94±4.79               |
| 1    | 24.66±2.41      | 39.26±5.42 <sup>##</sup> | 34.52±4.58 | 34.2±4.71                |
| 2    | 24.66±2.48      | 39.22±5.37 <sup>##</sup> | 34.18±4.27 | 33.68±4.29               |
| 3    | 25.06±2.10      | 39.04±5.40 <sup>##</sup> | 34.34±3.87 | 32.66±6.39               |
| 4    | 26.46±1.63      | 39.84±4.22 <sup>##</sup> | 35.08±3.84 | 31.50±4.88 <sup>**</sup> |
| 5    | 26.54±1.53      | 38.30±3.63 <sup>##</sup> | 34.72±3.68 | 31.14±4.40 <sup>*</sup>  |
| 6    | 25.76±1.80      | 37.22±4.03 <sup>##</sup> | 34.56±3.71 | 30.28±4.19 <sup>*</sup>  |
| 7    | 26.44±2.14      | 37.02±4.01 <sup>##</sup> | 33.58±3.66 | 30.58±3.16 <sup>*</sup>  |
| 8    | 26.00±2.12      | 36.50±3.54 <sup>##</sup> | 32.42±3.15 | 30.48±3.06 <sup>*</sup>  |

<sup>##</sup>*P* < 0.01 old mice vs. young mice. <sup>\*</sup>*P* < 0.05, <sup>\*\*</sup>*P* < 0.01  $\alpha$ -Man vs. old mice.

**Supplementary Table 2. List of oligonucleotide primer pairs used in qRT-PCR.**

| Gene                           | Forward                   | Reverse                   |
|--------------------------------|---------------------------|---------------------------|
| <i>18S</i>                     | AGCCTGCGGCTTAATTTGAC      | CAACTAAGAACGGCCATGCA      |
| <i>Arg-1</i>                   | CTCCAAGCCAAAGTCCTTAGAG    | AGGAGCTGTCATTAGGGACATC    |
| <i>Ccl5</i>                    | TGCAGAGGACTCTGAGACAGC     | GAGTGGTGTCCGAGCCATA       |
| <i>Ccl11</i>                   | AGAGCTCCACAGCGCTTCT       | GCAGGAAGTTGGGATGGA        |
| <i>Cd11c</i>                   | CTGGATAGCCTTTCTTCTGCTG    | GCACACTGTGTCCGAACTC       |
| <i>Cd206</i>                   | CAGGTGTGGGCTCAGGTAGT      | TGTGGTGAGCTGAAAGGTGA      |
| <i>Cd68</i>                    | CCTTATGGACAGCTTACCTTTGG   | CTGAGCAGCCTGTAGCCTTAGAG   |
| <i>Cox-2</i>                   | CCACCTCTGCGATGCTCTTC      | CATTCCCCACGGTTTTGACATG    |
| <i>Cx3c1l</i>                  | CATCCGCTATCAGCTAAACCA     | CAGAAGCGTCTGTGCTGTGT      |
| <i>Cxcl10</i>                  | GCTGCCGTCATTTTCTGC        | TCTCACTGGCCCGTCATC        |
| <i>F4/80</i>                   | CTTTGGCTATGGGCTTCCAGTC    | GCAAGGAGGACAGAGTTTATCGTG  |
| <i>Ifn-<math>\gamma</math></i> | GTCATTGAAAGCCTAGAAAGTCTGA | CTGTGGGTTGTTGACCTCAAACCT  |
| <i>Il-1<math>\beta</math></i>  | TGTTCTTTGAAGTTGACGGACCC   | TCATCTCGGAGCCTGTAGTGC     |
| <i>Il-6</i>                    | CCAGAGATACAAAGAAATGATGG   | ACTCCAGAAGACCAGAGGAAAT    |
| <i>iNos</i>                    | CCAAGCCCTCACCTACTTCC      | CTCTGAGGGCTGACACAAGG      |
| <i>Mcp-1</i>                   | CAACTCTCACTGAAGCCAGCTC    | TAGCTCTCCAGCCTACTCATTGG   |
| <i>Mip-1a</i>                  | CTTCTCTGTACCATGACACTCTGC  | ATTCAGTTCCAGGTCAGTGATGTAT |
| <i>Tnf-<math>\alpha</math></i> | GAGAAAGTCAACCTCCTCTCTG    | GAAGACTCCTCCAGGTATATG     |

**Supplementary Table 3. List of miRNA primers used in qRT-PCR.**

| miRNA                  | Company                  | Catalog number     |
|------------------------|--------------------------|--------------------|
| U6 snRNA RT-PCR primer | Thermo Fisher Scientific | 4427975(ID#001973) |
| miR-155 RT-PCR primer  | Thermo Fisher Scientific | 4427975(ID#002571) |
| Cel-miR-39             | Thermo Fisher Scientific | 4427975(ID#000200) |

**Supplementary Table 4. Antibodies used for Western blot and flow cytometry.**

| <b>Antibody</b>                                  | <b>Source</b> | <b>Vendor</b>             | <b>Catalog No.</b> |
|--------------------------------------------------|---------------|---------------------------|--------------------|
| anti-phospho-JNK (Thr183/Tyr185)                 | Mouse         | Santa Cruz Biotechnology  | sc-6254            |
| anti-JNK                                         | Rabbit        | Santa Cruz Biotechnology  | sc-571             |
| anti-phospho-p38 (Thr180/Tyr182)                 | Rabbit        | Cell Signaling Technology | #4511              |
| anti-p38                                         | Rabbit        | Cell Signaling Technology | #8690              |
| anti-phospho-ERK (Thr202/Tyr204)                 | Rabbit        | Cell Signaling Technology | #4370              |
| anti-ERK                                         | Rabbit        | Cell Signaling Technology | #4695              |
| anti-phospho-p65 (Ser536)                        | Rabbit        | Cell Signaling Technology | #3033              |
| anti- p65                                        | Rabbit        | Cell Signaling Technology | #8242              |
| anti-phospho-IKK $\alpha$ / $\beta$ (Ser176/180) | Rabbit        | Cell Signaling Technology | #2697              |
| anti-IKK $\alpha$                                | Mouse         | Cell Signaling Technology | #11930             |
| anti-IKK $\beta$                                 | Rabbit        | Cell Signaling Technology | #8943              |
| anti-phospho-I $\kappa$ B $\alpha$ (Ser32)       | Rabbit        | Cell Signaling Technology | #2859              |
| anti-I $\kappa$ B $\alpha$                       | Mouse         | Cell Signaling Technology | #4814              |
| anti-iNOS                                        | Rabbit        | Cell Signaling Technology | #13120             |
| anti-COX2                                        | Rabbit        | Cell Signaling Technology | #12282             |
| anti-SIRT3                                       | Rabbit        | Cell Signaling Technology | #5490              |
| anti-AKT                                         | Rabbit        | Santa Cruz Biotechnology  | sc-8312            |
| anti- phospho-AKT (Ser473)                       | Rabbit        | Santa Cruz Biotechnology  | sc-7985-R          |
| anti-perilipin                                   | Rabbit        | Cell Signaling Technology | #9349              |
| anti-CD68                                        | Rabbit        | ABclonal                  | A6554              |
| anti-F4/80                                       | Mouse         | eBioscience               | 12-4801-82         |
| anti-F4/80                                       | Mouse         | Santa Cruz Biotechnology  | sc-377009          |
| anti-CD11c                                       | Mouse         | BD Bioscience             | 557400             |
| anti-CD11c                                       | Rabbit        | ABclonal                  | A1508              |
| anti-CD206                                       | Mouse         | BioLegend                 | 141708             |
| anti-CD206                                       | Rabbit        | Abcam                     | ab64693            |
| $\alpha$ -tubulin                                | Mouse         | Santa Cruz Biotechnology  | sc-8035            |
| $\beta$ -actin                                   | Rabbit        | Cell Signaling Technology | #8457              |
| GAPDH                                            | Rabbit        | Santa Cruz Biotechnology  | sc-25778           |
| Histone H3                                       | Rabbit        | Santa Cruz Biotechnology  | sc-10809           |
